# Supplementary material for: Longitudinal biomarkers and kidney disease progression after acute kidney injury
Source: PubMed Central journal article supplement (PMC10243801; doi:10.1172/jci.insight.167731), 2023-05-08
Supplement: jciinsight-8-167731-s153.pdf [file jciinsight-8-167731-s153.pdf]

## **List of Supplemental Materials**

**Figure S1.** Associations between slopes of biomarkers of kidney injury, inflammation and tubular health with the composite CKD outcome in participants without recurrent AKI

**Figure S2.** Associations between tertiles of the slopes of biomarkers of kidney injury, inflammation and tubular health and kidney function decline

**Figure S3.** Associations between slopes of biomarkers of kidney injury, inflammation and tubular health with incident CKD and with CKD progression

**Figure S4.** Associations between biomarker slopes from hospitalization to 3- months visits, and from 3- to 12-months visits with the composite CKD outcome

**Table S1.** Monthly biomarker percentage change in participants without recurrent AKI

**Table S2.** Biomarker measurement assays

**Table S3.** Mean and standard deviation of biomarker slopes

**Table S4.** Significance levels comparing biomarker gene expression in kidneys from mouse models of atrophy and repair after ischemic reperfusion injury

**Table S5.** STROBE checklist.

**Supplemental Figure S1. Associations between slopes of biomarkers of kidney injury, inflammation and tubular health with the composite CKD outcome in participants without recurrent AKI**

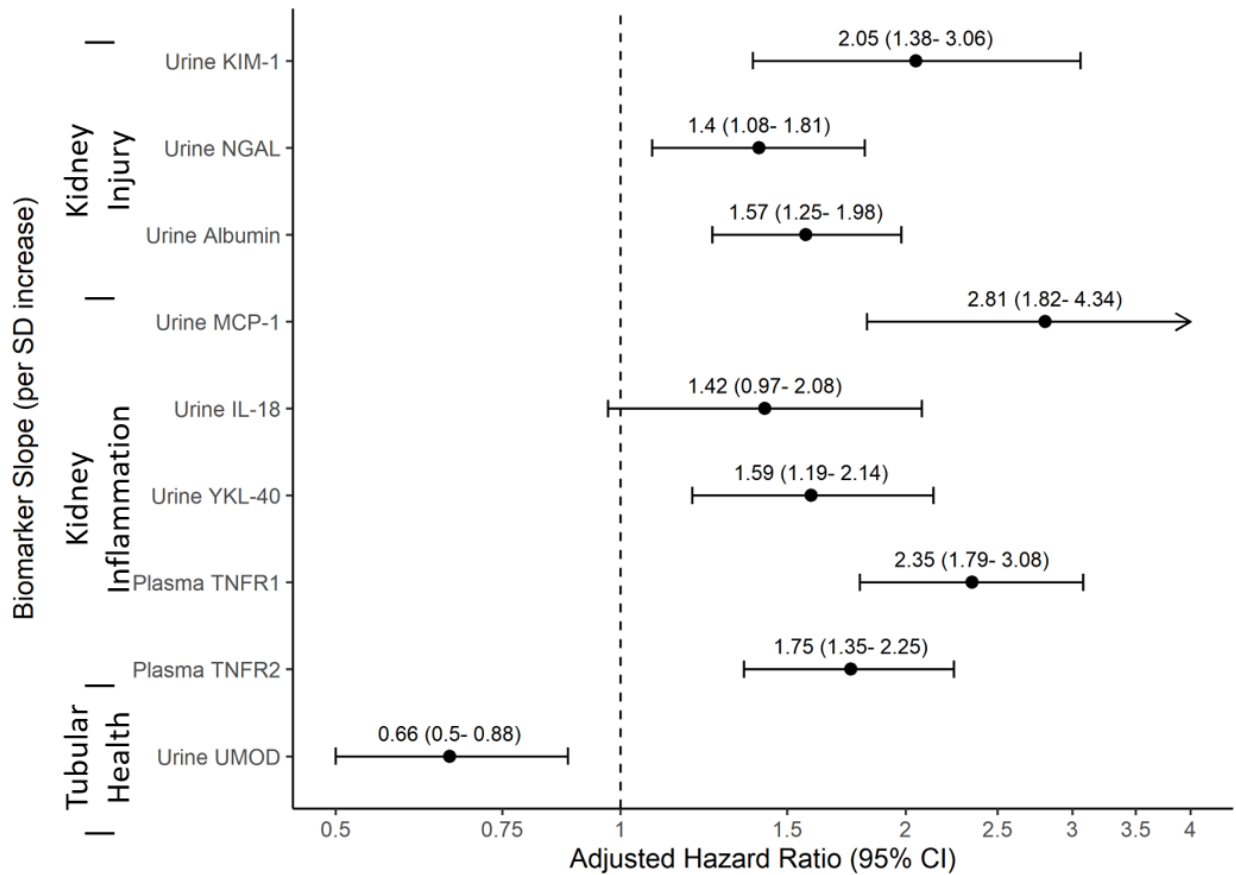

Five hundred and sixty-one participants did not have recurrent AKI from hospitalization to 12 months after discharge.

Model adjusted for biomarker at hospitalization, age, sex, self-identified race, Hispanic ethnicity, hypertension, diabetes, atherosclerotic cardiovascular disease, congestive heart failure, smoking status, baseline eGFR prior to hospitalization, albuminuria at hospitalization, urine creatinine at hospitalization and the slope of urine creatinine from hospitalization to 12 months after discharge.

**Supplemental Figure S2. Associations between tertiles of the slopes of biomarkers of kidney injury, inflammation and tubular health and kidney function decline**

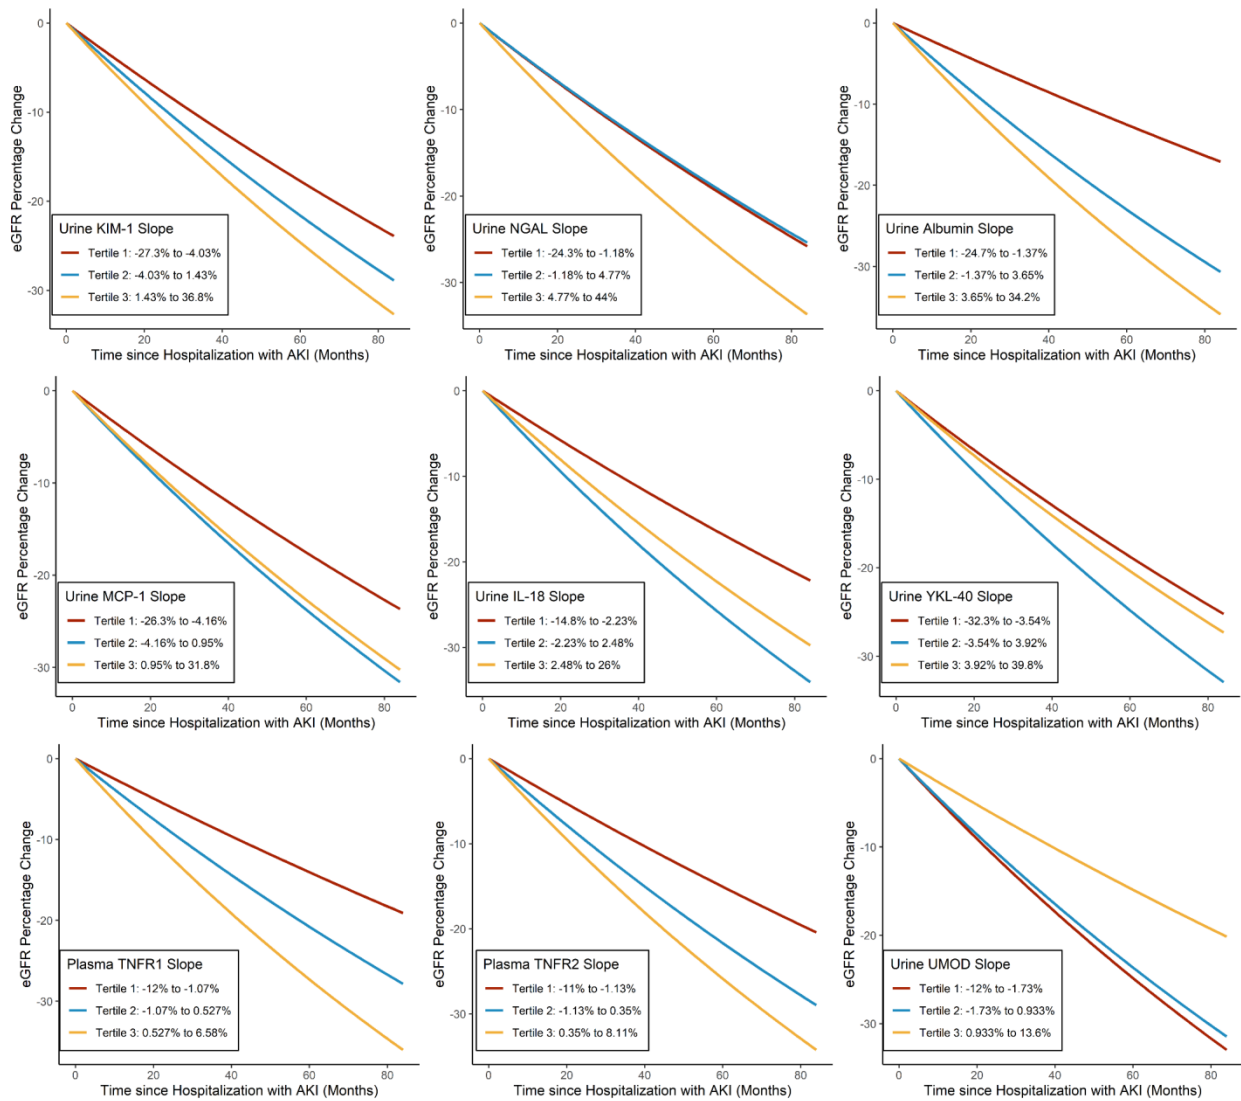

**Supplemental Figure S3. Associations between slopes of biomarkers of kidney injury, inflammation and tubular health with incident CKD and with CKD progression**

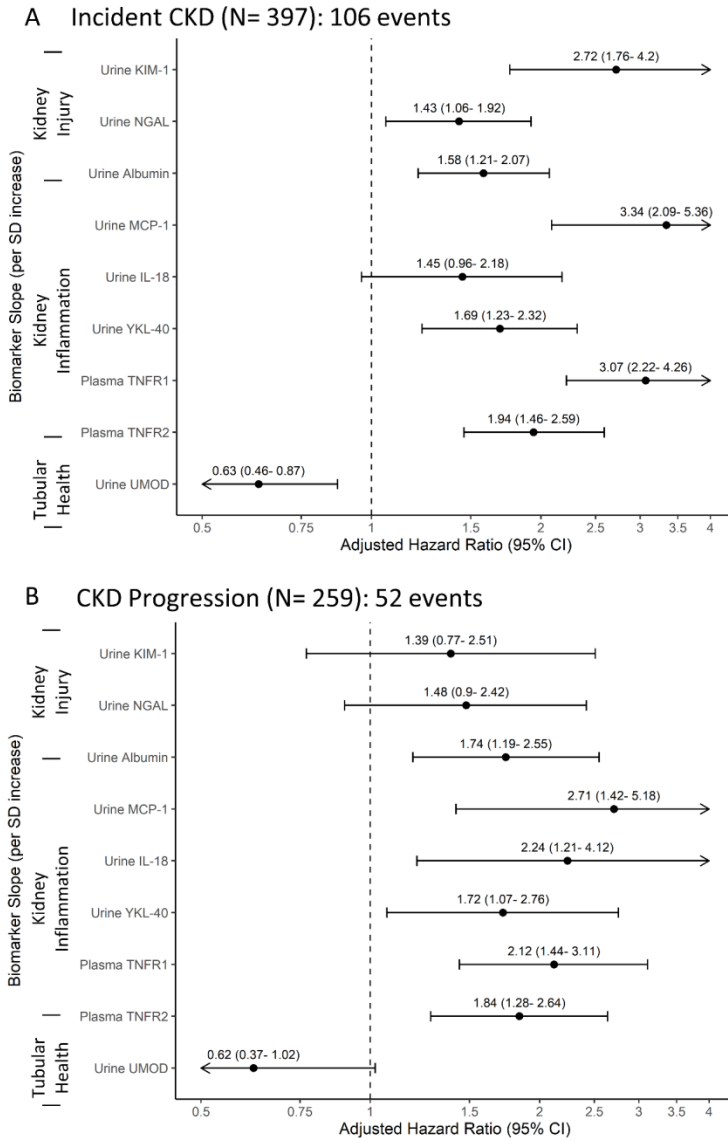

(A) Biomarker slopes' associations with incident CKD in 397 participants without pre-existing CKD; (B) Biomarker slopes' associations with CKD progression in 259 participants with pre-existing CKD.

Model adjusted for biomarker at hospitalization, age, sex, self-identified race, Hispanic ethnicity, hypertension, diabetes, atherosclerotic cardiovascular disease, congestive heart failure, smoking status, baseline eGFR prior to hospitalization, albuminuria at hospitalization, urine creatinine at hospitalization and the slope of urine creatinine from hospitalization to 12 months after discharge.

**Supplemental Figure S4. Associations between biomarker slopes from hospitalization to 3- months visits, and from 3- to 12-months visits with the composite CKD outcome**

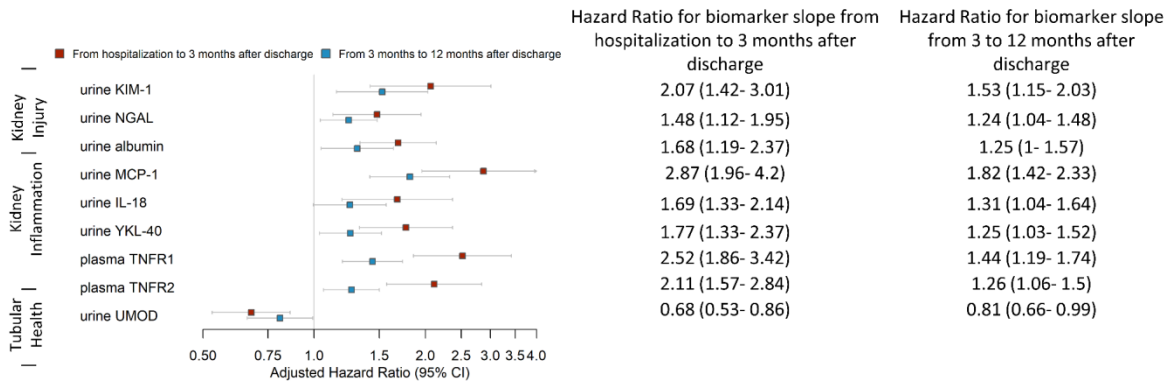

Five hundred and eighty-one participants had urine biomarkers measured at all three timepoints, and 541 participants had plasma biomarkers measured at all three timepoints.

Biomarker slopes at both time intervals were scaled by their standard deviations, so the hazard ratios represent the risk of CKD outcome per standard deviation increase in biomarker slopes.

Model adjusted for biomarker at hospitalization, age, sex, self-identified race, Hispanic ethnicity, hypertension, diabetes, atherosclerotic cardiovascular disease, congestive heart failure, smoking status, baseline eGFR prior to hospitalization, albuminuria at hospitalization, urine creatinine at hospitalization and the slope of urine creatinine from hospitalization to 12 months after discharge.

**Supplemental Table S1. Monthly biomarker percentage change in participants without recurrent AKI**

| <b>Biomarker Category</b>  |                      | <b>Biomarker Percentage Change from hospitalization to 12 months after hospitalization (per month)*, median (Q1, Q3)</b> |                            |                           |          |
|----------------------------|----------------------|--------------------------------------------------------------------------------------------------------------------------|----------------------------|---------------------------|----------|
|                            |                      | <b>No CKD Outcome</b>                                                                                                    |                            |                           | <b>p</b> |
| <b>Biomarker</b>           | <b>Total (N=561)</b> | <b>(N=440)</b>                                                                                                           | <b>CKD Outcome (N=121)</b> | <b>Value<sup>#</sup></b>  |          |
| <b>Kidney Injury</b>       | <b>Urine KIM-1</b>   | -1.15%<br>(-6.08%, 2.86%)                                                                                                | -1.43%<br>(-6.59%, 2.65%)  | -0.69%<br>(-4.94%, 3.49%) | 0.08     |
|                            | <b>Urine NGAL</b>    | 1.47%<br>(-3.94%, 6.13%)                                                                                                 | 1.11%<br>(-4.42%, 5.89%)   | 2.19%<br>(-1.54%, 8.12%)  | 0.079    |
|                            | <b>Urine Albumin</b> | 1.07%<br>(-3.22%, 5.08%)                                                                                                 | 0.76%<br>(-3.84%, 4.66%)   | 3.04%<br>(-0.82%, 6.26%)  | < 0.001  |
| <b>Kidney Inflammation</b> | <b>Urine MCP-1</b>   | -1.32%<br>(-5.8%, 2.28%)                                                                                                 | -1.64%<br>(-6.04, % 2.17%) | -0.81%<br>(-5.44%, 2.33%) | 0.262    |
|                            | <b>Urine IL-18</b>   | 0.02%<br>(-3.71%, 3.94%)                                                                                                 | -0.18%<br>(-4.13%, 3.67%)  | 1.02%<br>(-2.99%, 4.99%)  | 0.036    |
|                            | <b>Urine YKL-40</b>  | 0.1%<br>(-6.65%, 5.87%)                                                                                                  | -0.22%<br>(-6.71%, 5.19%)  | 2.04%<br>(-5.37%, 8.15%)  | 0.024    |
|                            | <b>Plasma TNFR1</b>  | -0.41%<br>(-1.68%, 0.94%)                                                                                                | -0.55%<br>(-1.76%, 0.76%)  | 0.17%<br>(-1.22%, 1.38%)  | 0.002    |
|                            | <b>Plasma TNFR2</b>  | -0.38%<br>(-1.72%, 0.8%)                                                                                                 | -0.52%<br>(-1.86%, 0.64%)  | 0.01%<br>(-1.46%, 1.09%)  | 0.014    |

|                       |                   |                          |                           |                           |       |
|-----------------------|-------------------|--------------------------|---------------------------|---------------------------|-------|
| <b>Tubular Health</b> | <b>Urine UMOD</b> | -0.26%<br>(-2.51%, 1.8%) | -0.11%<br>(-2.38%, 1.94%) | -0.72%<br>(-3.24%, 1.28%) | 0.041 |
|-----------------------|-------------------|--------------------------|---------------------------|---------------------------|-------|

\*Monthly percentage changes were converted from the slopes of log2-transformed biomarker for interpretation.

#p value calculated using Wilcoxon tests.



**Supplemental Table S2. Biomarker measurement assays**

| <b>Biomarker</b> | <b>Biomarker Name</b>                          | <b>Urine or<br/>Plasma</b> | <b>Assay</b>                                            |
|------------------|------------------------------------------------|----------------------------|---------------------------------------------------------|
| KIM-1            | Kidney injury molecule-1                       | Urine                      | Duoset DY1750, R & D Systems Inc.,<br>Minneapolis, MN   |
| IL-18            | Interleukin-18                                 | Urine                      | Medical & Biological Laboratories Co.,<br>Nagoya, Japan |
| MCP-1            | Monocyte chemoattractant<br>protein-1          | Urine                      | Meso Scale Diagnostics, Gaithersberg,<br>MD             |
| UMOD             | Uromodulin                                     | Urine                      | Meso Scale Diagnostics, Gaithersberg,<br>MD             |
| NGAL             | Neutrophil gelatinase-<br>associated lipocalin | Urine                      | NGAL ELISA Kit 036; Bioporto,<br>Grusbakken, Denmark    |
| YKL-40           | Chitinase 3-like 1                             | Urine                      | Meso Scale Diagnostics, Gaithersberg,<br>MD             |
| Albumin          | Albumin                                        | Urine                      | Siemens ProSpec analyzer (Siemens<br>GMBH)              |
| TNFR1            | Soluble tumor necrosis<br>factor receptor-1    | Plasma                     | Meso Scale Diagnostics, Gaithersberg,<br>MD             |
| TNFR2            | Soluble tumor necrosis<br>factor receptor-2    | Plasma                     | Meso Scale Diagnostics, Gaithersberg,<br>MD             |

**Supplemental Table S3. Mean and standard deviation of biomarker slopes**

| <b>Biomarker</b> | <b>Biomarker Slope (log2 change per month), mean (SD)</b> | <b>Biomarker Monthly Percentage Change*, mean (SD)</b> |
|------------------|-----------------------------------------------------------|--------------------------------------------------------|
| Urine KIM-1      | -0.024 (0.109)                                            | -1.36% (7.42%)                                         |
| Urine NGAL       | 0.017 (0.125)                                             | 1.57% (8.73%)                                          |
| Urine Albumin    | 0.011 (0.110)                                             | 1.08% (7.53%)                                          |
| Urine MCP-1      | -0.030 (0.107)                                            | -1.78% (7.21%)                                         |
| Urine IL-18      | 0.003 (0.090)                                             | 0.38% (6.31%)                                          |
| Urine YKL-40     | -0.005 (0.148)                                            | 0.18% (10.24%)                                         |
| Plasma TNFR1     | -0.007 (0.034)                                            | -0.44% (2.35%)                                         |
| Plasma TNFR2     | -0.009 (0.036)                                            | -0.58% (2.46%)                                         |
| Urine UMOD       | -0.007 (0.052)                                            | -0.45% (3.60%)                                         |

\*Biomarker monthly percentage change was calculated from biomarker slope

**Supplemental Table S4. Significance levels comparing biomarker gene expression in kidneys from mouse models of atrophy and repair after ischemic reperfusion injury**

| <b>Biomarker gene\ Significance level</b> | <b>model factor (atrophy vs. repair model)</b> | <b>time factor</b> | <b>model- time interaction</b> |
|-------------------------------------------|------------------------------------------------|--------------------|--------------------------------|
| Havcr1                                    | <0.0001                                        | <0.0001            | <0.0001                        |
| Lcn2                                      | 0.4888                                         | <0.0001            | <0.0001                        |
| Ccl2                                      | <0.0001                                        | <0.0001            | <0.0001                        |
| Il18                                      | <0.0001                                        | <0.0001            | <0.0001                        |
| Chi3l1                                    | <0.0001                                        | <0.0001            | <0.0001                        |
| Tnfrsf1a                                  | <0.0001                                        | 0.0012             | 0.0012                         |
| Tnfrsf1b                                  | <0.0001                                        | <0.0001            | <0.0001                        |
| Umod                                      | 0.0003                                         | <0.0001            | <0.0001                        |

**Supplemental Table S5.** STROBE Statement—checklist of items that should be included in reports of observational studies

|                           | <b>Item No.</b> | <b>Recommendation</b>                                                                                                                                                                                                                                                                                                                                                                                                                                                          | <b>Page No.</b> | <b>Relevant text from manuscript</b> |
|---------------------------|-----------------|--------------------------------------------------------------------------------------------------------------------------------------------------------------------------------------------------------------------------------------------------------------------------------------------------------------------------------------------------------------------------------------------------------------------------------------------------------------------------------|-----------------|--------------------------------------|
| <b>Title and abstract</b> | 1               | (a) Indicate the study’s design with a commonly used term in the title or the abstract                                                                                                                                                                                                                                                                                                                                                                                         | 3               |                                      |
|                           |                 | (b) Provide in the abstract an informative and balanced summary of what was done and what was found                                                                                                                                                                                                                                                                                                                                                                            | 3               |                                      |
| <b>Introduction</b>       |                 |                                                                                                                                                                                                                                                                                                                                                                                                                                                                                |                 |                                      |
| Background/rationale      | 2               | Explain the scientific background and rationale for the investigation being reported                                                                                                                                                                                                                                                                                                                                                                                           | 5-6             |                                      |
| Objectives                | 3               | State specific objectives, including any prespecified hypotheses                                                                                                                                                                                                                                                                                                                                                                                                               | 6               |                                      |
| <b>Methods</b>            |                 |                                                                                                                                                                                                                                                                                                                                                                                                                                                                                |                 |                                      |
| Study design              | 4               | Present key elements of study design early in the paper                                                                                                                                                                                                                                                                                                                                                                                                                        | 6, 16           |                                      |
| Setting                   | 5               | Describe the setting, locations, and relevant dates, including periods of recruitment, exposure, follow-up, and data collection                                                                                                                                                                                                                                                                                                                                                | 16              |                                      |
| Participants              | 6               | (a) <i>Cohort study</i> —Give the eligibility criteria, and the sources and methods of selection of participants. Describe methods of follow-up<br><br><i>Case-control study</i> —Give the eligibility criteria, and the sources and methods of case ascertainment and control selection. Give the rationale for the choice of cases and controls<br><br><i>Cross-sectional study</i> —Give the eligibility criteria, and the sources and methods of selection of participants | 16              |                                      |
|                           |                 | (b) <i>Cohort study</i> —For matched studies, give matching criteria and number of exposed and unexposed<br><br><i>Case-control study</i> —For matched studies, give matching criteria and the number of controls per case                                                                                                                                                                                                                                                     |                 | 16                                   |

|                              |    |                                                                                                                                                                                      |       |
|------------------------------|----|--------------------------------------------------------------------------------------------------------------------------------------------------------------------------------------|-------|
| Variables                    | 7  | Clearly define all outcomes, exposures, predictors, potential confounders, and effect modifiers. Give diagnostic criteria, if applicable                                             | 17    |
| Data sources/<br>measurement | 8* | For each variable of interest, give sources of data and details of methods of assessment (measurement). Describe comparability of assessment methods if there is more than one group | 17    |
| Bias                         | 9  | Describe any efforts to address potential sources of bias                                                                                                                            | 16    |
| Study size                   | 10 | Explain how the study size was arrived at                                                                                                                                            | 16-17 |

Continued on next page

|                        |     |                                                                                                                                                                                                   |              |
|------------------------|-----|---------------------------------------------------------------------------------------------------------------------------------------------------------------------------------------------------|--------------|
| Quantitative variables | 11  | Explain how quantitative variables were handled in the analyses. If applicable, describe which groupings were chosen and why                                                                      | 19-20        |
| Statistical methods    | 12  | (a) Describe all statistical methods, including those used to control for confounding                                                                                                             | 19-20        |
|                        |     | (b) Describe any methods used to examine subgroups and interactions                                                                                                                               | 20           |
|                        |     | (c) Explain how missing data were addressed                                                                                                                                                       | 17, 19       |
|                        |     | (d) <i>Cohort study</i> —If applicable, explain how loss to follow-up was addressed                                                                                                               | 20           |
|                        |     | <i>Case-control study</i> —If applicable, explain how matching of cases and controls was addressed                                                                                                |              |
|                        |     | <i>Cross-sectional study</i> —If applicable, describe analytical methods taking account of sampling strategy                                                                                      |              |
|                        |     | (e) Describe any sensitivity analyses                                                                                                                                                             | 20           |
| <b>Results</b>         |     |                                                                                                                                                                                                   |              |
| Participants           | 13* | (a) Report numbers of individuals at each stage of study—eg numbers potentially eligible, examined for eligibility, confirmed eligible, included in the study, completing follow-up, and analysed | 6, 28        |
|                        |     | (b) Give reasons for non-participation at each stage                                                                                                                                              | 6, 19        |
|                        |     | (c) Consider use of a flow diagram                                                                                                                                                                | Fig 1        |
| Descriptive data       | 14* | (a) Give characteristics of study participants (eg demographic, clinical, social) and information on exposures and potential confounders                                                          | 6-7, Table 1 |
|                        |     | (b) Indicate number of participants with missing data for each variable of interest                                                                                                               | NA           |
|                        |     | (c) <i>Cohort study</i> —Summarise follow-up time (eg, average and total amount)                                                                                                                  | 7            |
| Outcome data           | 15* | <i>Cohort study</i> —Report numbers of outcome events or summary measures over time                                                                                                               | 7            |
|                        |     | <i>Case-control study</i> —Report numbers in each exposure category, or summary measures of exposure                                                                                              |              |
|                        |     | <i>Cross-sectional study</i> —Report numbers of outcome events or summary measures                                                                                                                |              |

|              |    |                                                                                                                                                                                                              |           |
|--------------|----|--------------------------------------------------------------------------------------------------------------------------------------------------------------------------------------------------------------|-----------|
| Main results | 16 | (a) Give unadjusted estimates and, if applicable, confounder-adjusted estimates and their precision (eg, 95% confidence interval). Make clear which confounders were adjusted for and why they were included | 8         |
|              |    | (b) Report category boundaries when continuous variables were categorized                                                                                                                                    | 29, Fig 2 |
|              |    | (c) If relevant, consider translating estimates of relative risk into absolute risk for a meaningful time period                                                                                             | NA        |

Continued on next page

|                          |    |                                                                                                                                                                            |       |
|--------------------------|----|----------------------------------------------------------------------------------------------------------------------------------------------------------------------------|-------|
| Other analyses           | 17 | Report other analyses done—eg analyses of subgroups and interactions, and sensitivity analyses                                                                             | 8- 9  |
| <b>Discussion</b>        |    |                                                                                                                                                                            |       |
| Key results              | 18 | Summarise key results with reference to study objectives                                                                                                                   | 11    |
| Limitations              | 19 | Discuss limitations of the study, taking into account sources of potential bias or imprecision. Discuss both direction and magnitude of any potential bias                 | 15    |
| Interpretation           | 20 | Give a cautious overall interpretation of results considering objectives, limitations, multiplicity of analyses, results from similar studies, and other relevant evidence | 15    |
| Generalisability         | 21 | Discuss the generalisability (external validity) of the study results                                                                                                      | 13-14 |
| <b>Other information</b> |    |                                                                                                                                                                            |       |
| Funding                  | 22 | Give the source of funding and the role of the funders for the present study and, if applicable, for the original study on which the present article is based              | 22    |

\*Give information separately for cases and controls in case-control studies and, if applicable, for exposed and unexposed groups in cohort and cross-sectional studies.

**Note:** An Explanation and Elaboration article discusses each checklist item and gives methodological background and published examples of transparent reporting. The STROBE checklist is best used in conjunction with this article (freely available on the Web sites of PLoS Medicine at <http://www.plosmedicine.org/>, Annals of Internal Medicine at <http://www.annals.org/>, and Epidemiology at <http://www.epidem.com/>). Information on the STROBE Initiative is available at [www.strobe-statement.org](http://www.strobe-statement.org)



## Supplemental Acknowledgments

ASSESS-AKI consortium:

Johns Hopkins University, Baltimore, MD: Chirag R. Parikh, Steven Menez, and Yumeng Wen;

Icahn School of Medicine at Mount Sinai, New York, NY: Steven G. Coca;

Yale School of Medicine, New Haven, CT: Dennis G. Moledina;

Western University, London, Canada: Amit X. Garg;

Kaiser Permanente Northern California, Oakland, CA: Alan S. Go, Sijie Zheng and Leonid V. Pravoverov;

University of California, San Francisco, San Francisco, CA: Chi-yuan Hsu, Raymond K. Hsu, and Kathleen D. Liu;

Pennsylvania State University, Hershey, PA: Vernon M. Chinchilli, Nasrollah Ghahramani;

University of Texas San Antonio, San Antonio, TX: W. Brian Reeves;

Vanderbilt University, Nashville, TN: T. Alp Ikizler, Edward D. Siew, Julia B. Lewis and Lorraine Ware;

Cincinnati Children's Hospital, Cincinnati, OH: Prasad Devarajan, Catherine D. Krawczeski, and Michael R. Bennett;

Montreal Children's Hospital, Montreal, Canada: Michael Zappitelli;

University of Washington, Seattle, WA: Jonathan Himmelfarb, Mark M. Wurfel;

New York University, New York, NY: James S. Kaufman;

National Institute of Health, Bethesda, MD: Paul L. Kimmel;

University of Iowa, Iowa City, IA: John B. Stokes (in memoriam).
